# Supplementary material
Source: HighWire-hosted journal article supplement (https://fg.bmj.com/highwire/filestream/143312/field_highwire_adjunct_files/0/flgastro-2021-101976supp001_data_supplement.pdf)
Supplement: flgastro-2021-101976supp001_data_supplement.pdf [file flgastro-2021-101976supp001_data_supplement.pdf]

Supplementary Figure 1 – Overview of the SLTC pathway

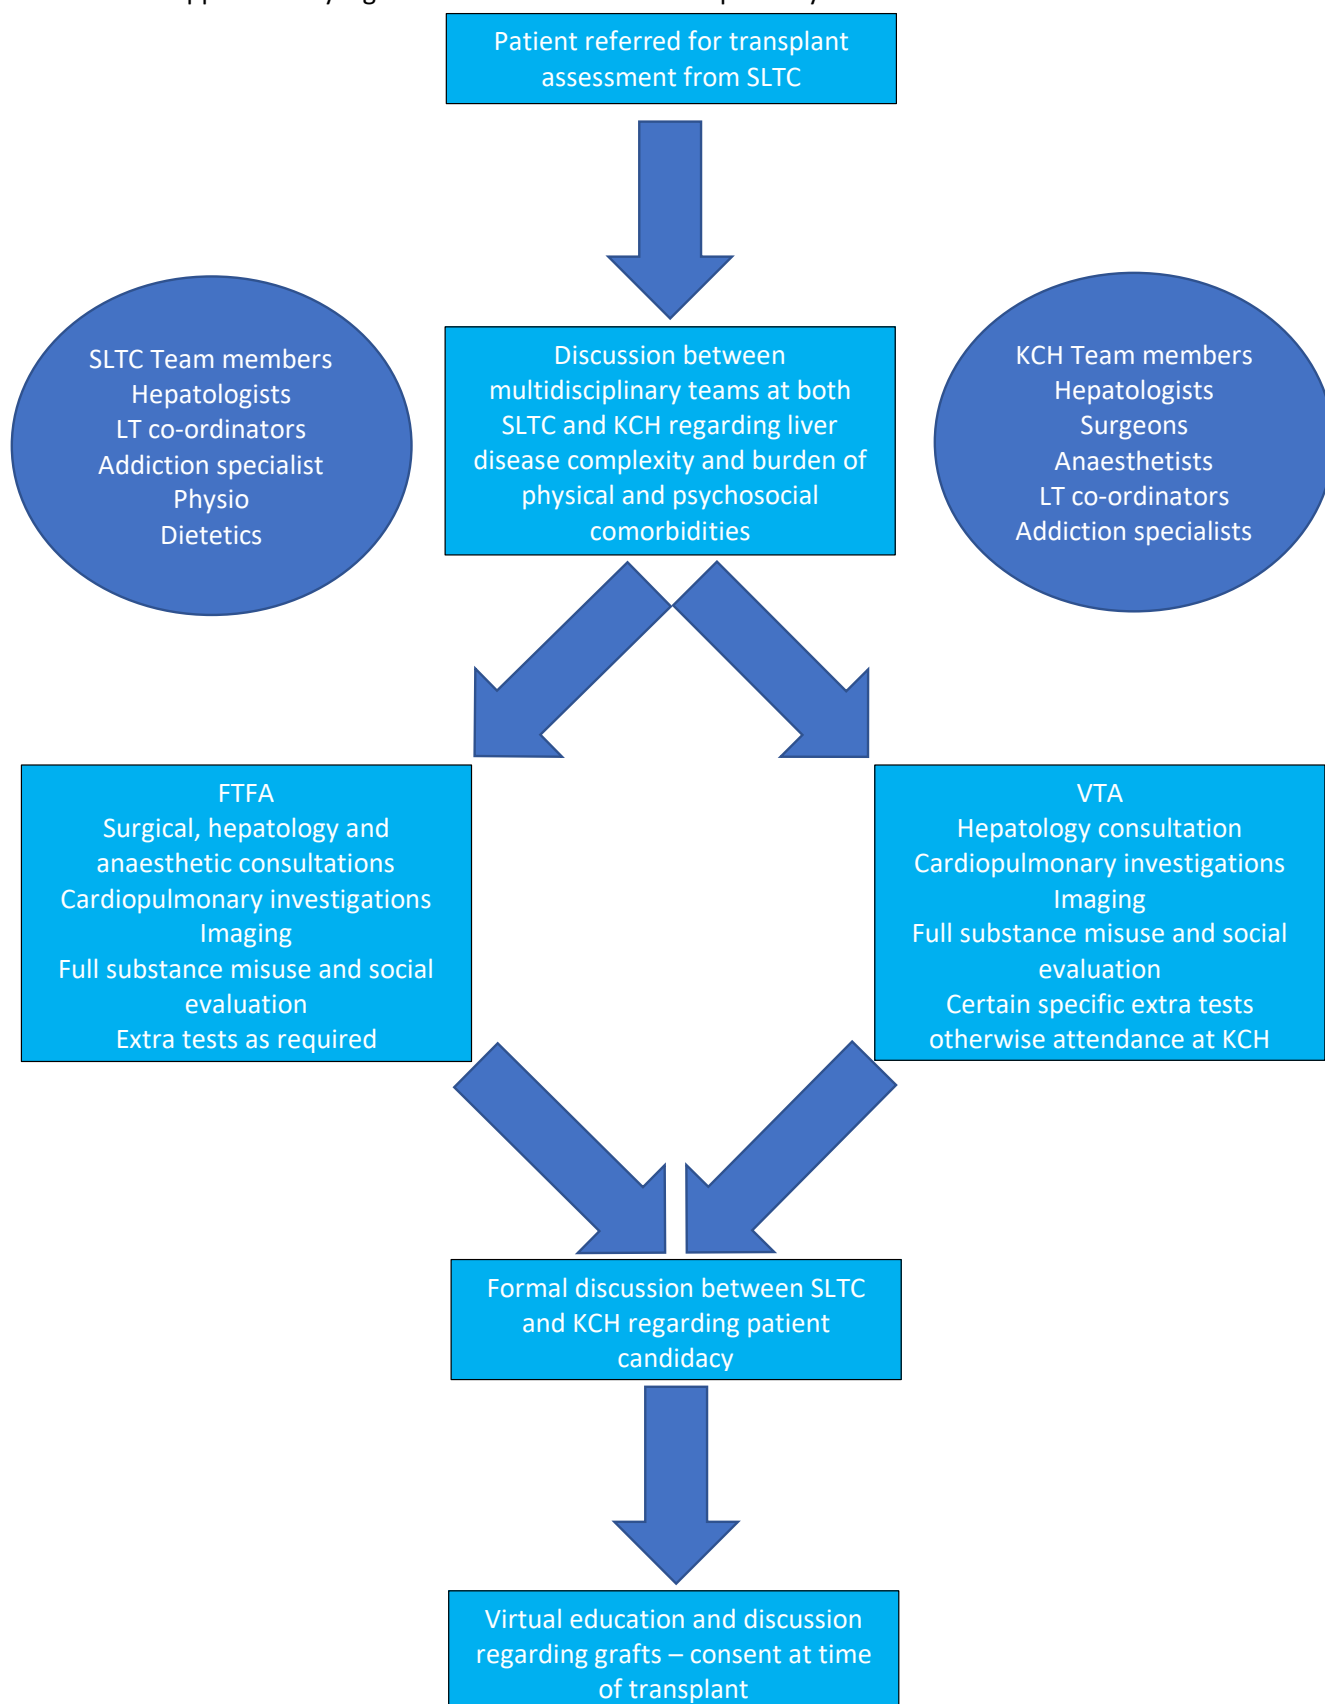

| Variable                                          | N  | VTA (n=19)       | N  | FTFA (n=30)      | P value |
|---------------------------------------------------|----|------------------|----|------------------|---------|
| Age                                               | 19 | 57.0 (49.0-60.0) | 30 | 61.5 (56.8-64.3) | 0.05    |
| Sex (male)                                        | 19 | 13 (68.4%)       | 30 | 18 (60.0%)       | 0.76    |
| Current/Ex-smoker                                 | 19 | 8 (42.1%)        | 29 | 14 (48.3%)       | 0.77    |
| ARLD                                              | 19 | 9 (47.4%)        | 30 | 9 (30.0%)        | 0.24    |
| NAFLD                                             | 19 | 2 (10.5%)        | 30 | 5 (16.7%)        | 0.69    |
| Autoimmune liver diseases<br>(PBC/PSC/AIH)        | 19 | 6 (31.6%)        | 30 | 13 (43.3%)       | 0.55    |
| Redo transplantation                              | 19 | 1 (5.3%)         | 30 | 0 (0.0%)         | 0.39    |
| HCC                                               | 19 | 0 (0.0%)         | 30 | 2 (6.7%)         | 0.52    |
| UKELD                                             | 19 | 54.5 (5.7)       | 30 | 54.1 (6.0)       | 0.81    |
| MELD                                              | 19 | 12 (10.3-16.8)   | 30 | 10 (6.8-13.5)    | 0.10    |
| CP score                                          | 19 | 8.6 (2.7)        | 30 | 7.8 (1.6)        | 0.24    |
| Time from referral to<br>completion of assessment | 19 | 62 (48.0-125.0)  | 28 | 42 (21.0-54.5)   | 0.01*   |
| Patient listed for transplant                     | 19 | 18 (94.7%)       | 30 | 26 (86.7%)       | 0.64    |

**Supplementary Table 1. Table demonstrating a comparison of demographic, clinical and prognostic scores between patients assessed via VTA and FTFA.**

Results from *t* tests are displayed as mean (SD). Results from Mann Whitney *U* tests are displayed as median (IQR). Results from Fisher's exact tests are presented as

number (%). Statistical significance was determined by a p value <0.05 and signified by \*.
